# Supplementary material for: Coordination chemistry of a new P,Te-centred ligand: synthesis, NMR spectra and X-ray structures of M(TePPri2NPPri2)2(M = Zn, Cd, Hg)
Source: Royal Society of Chemistry journal article supplement (doi:10.1039/b715789d), 2007-12-19
Supplement: b715789d.pdf [file b715789d.pdf]

**Coordination chemistry of a new *P,Te*-centred ligand: synthesis, NMR spectra and X-ray structures of**

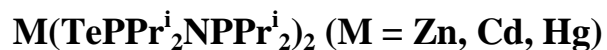

**Jamie S. Ritch and Tristram Chivers\***

*Department of Chemistry, University of Calgary, 2500 University Drive NW, Calgary, AB, T2N 1N4, Canada.*

*Email: chivers@ucalgary.ca; Fax: (+1)403-289-9388; Tel: (+1)403-220-5741*

**Electronic Supplementary Information:**

**Figure 1.** TGA Curves for Complexes **6-8**.

**Figure 2.** TGA/DSC Plot for  $\text{Zn}(\text{TePPr}^i_2\text{NPPr}^i_2)_2$  (**6**).

**Figure 3.** TGA/DSC Plot for  $\text{Cd}(\text{TePPr}^i_2\text{NPPr}^i_2)_2$  (**7**).

**Figure 4.** TGA/DSC Plot for  $\text{Hg}(\text{TePPr}^i_2\text{NPPr}^i_2)_2$  (**8**).

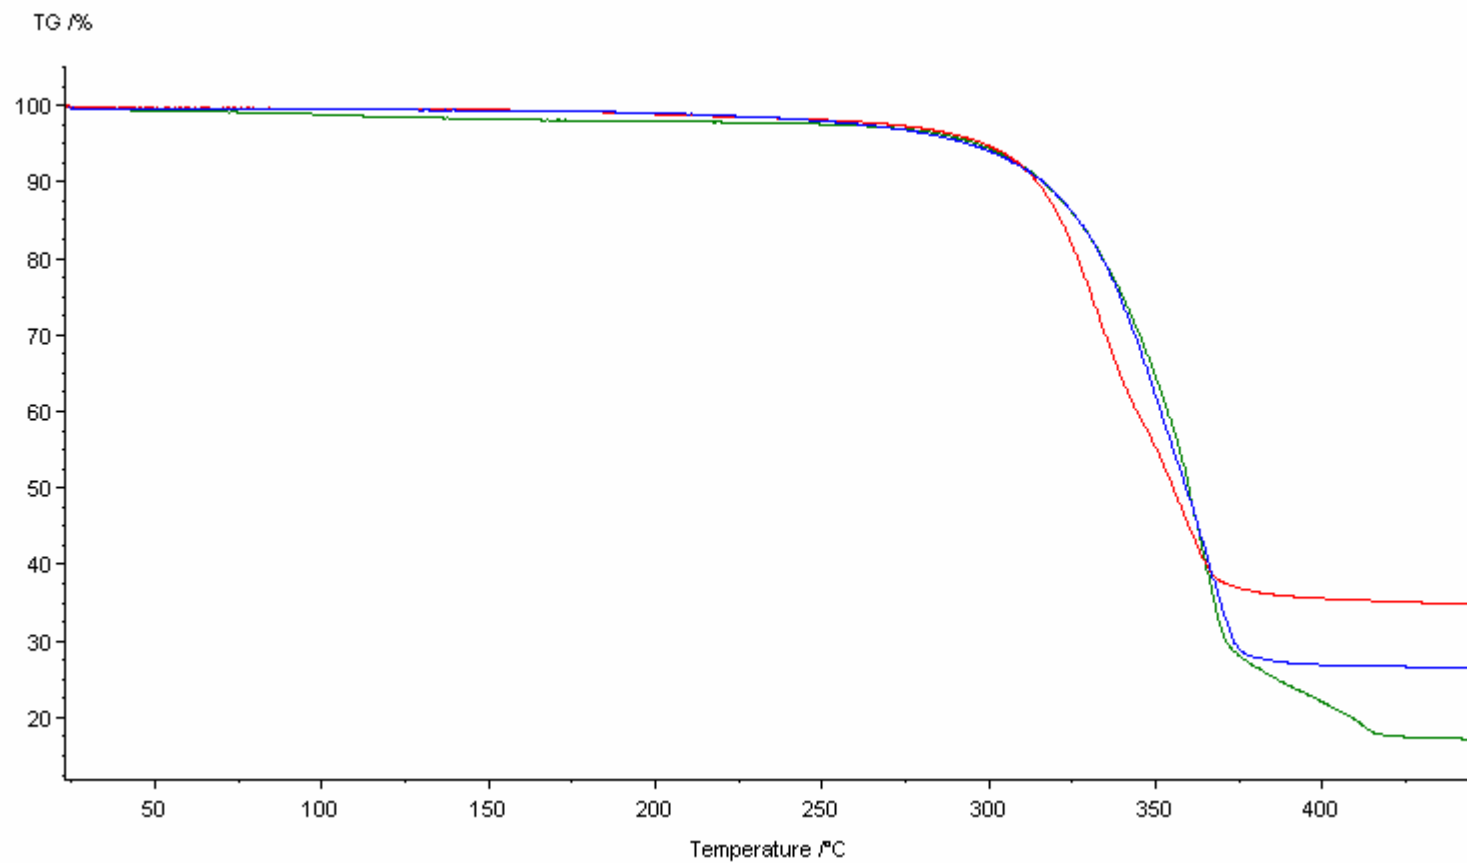

**Figure 1.** TGA curves for the complexes  $M(\text{TePPr}^i_2\text{NPPr}^i_2)_2$  [blue:  $M = \text{Zn}$  (**6**); red:  $M = \text{Cd}$  (**7**); green:  $M = \text{Hg}$  (**8**)].

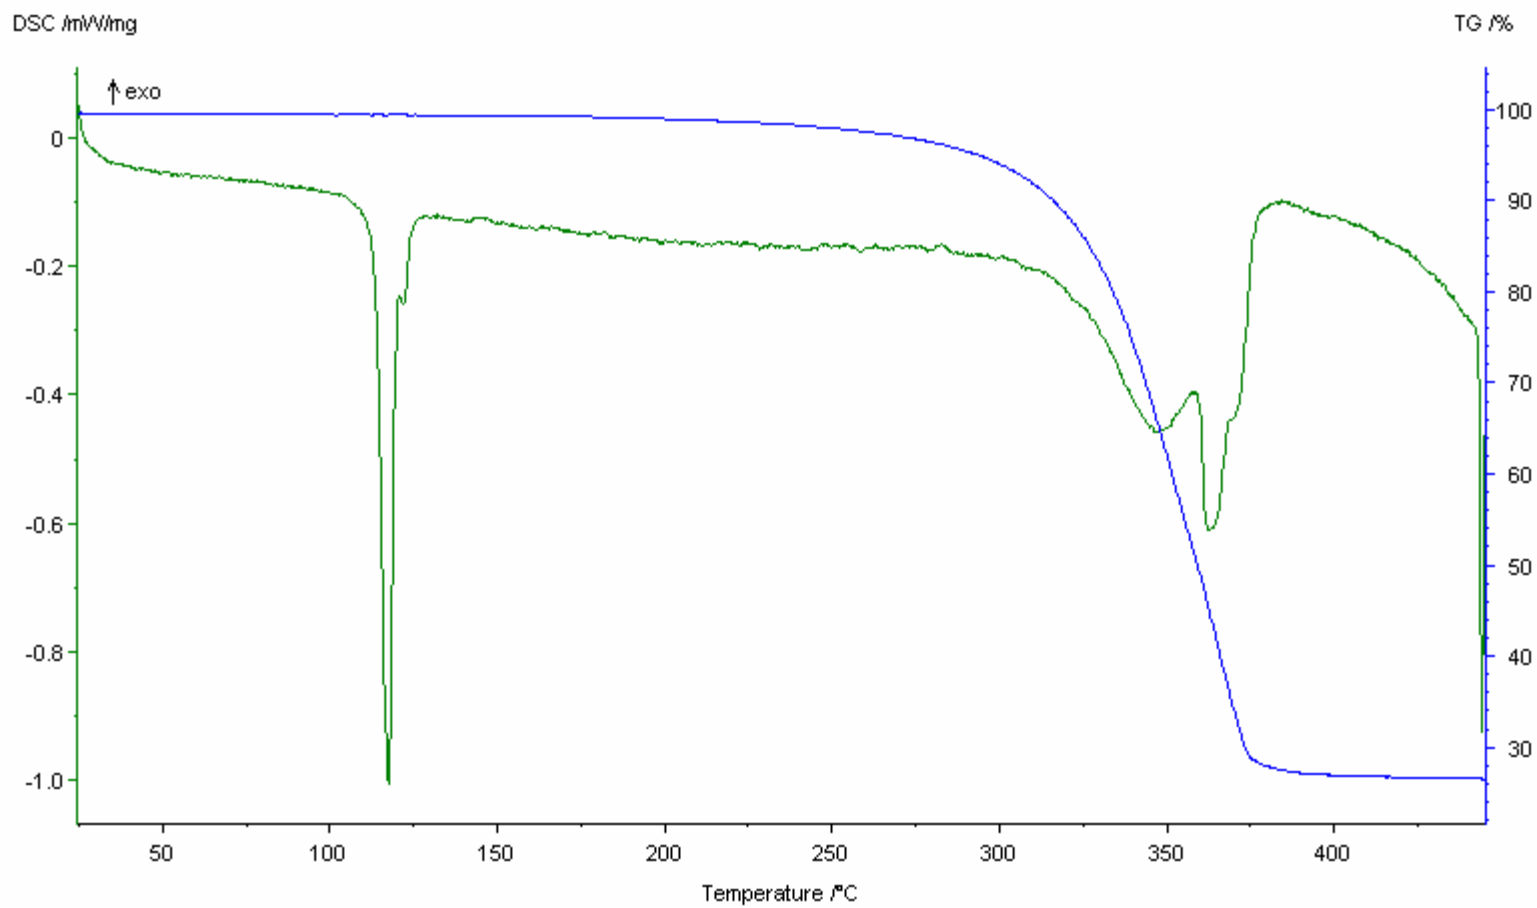

**Figure 2.** TGA/DSC Plot for  $\text{Zn}(\text{TePPri}_2\text{NPPri}_2)_2$  (**6**) [blue: TGA; green: DSC].

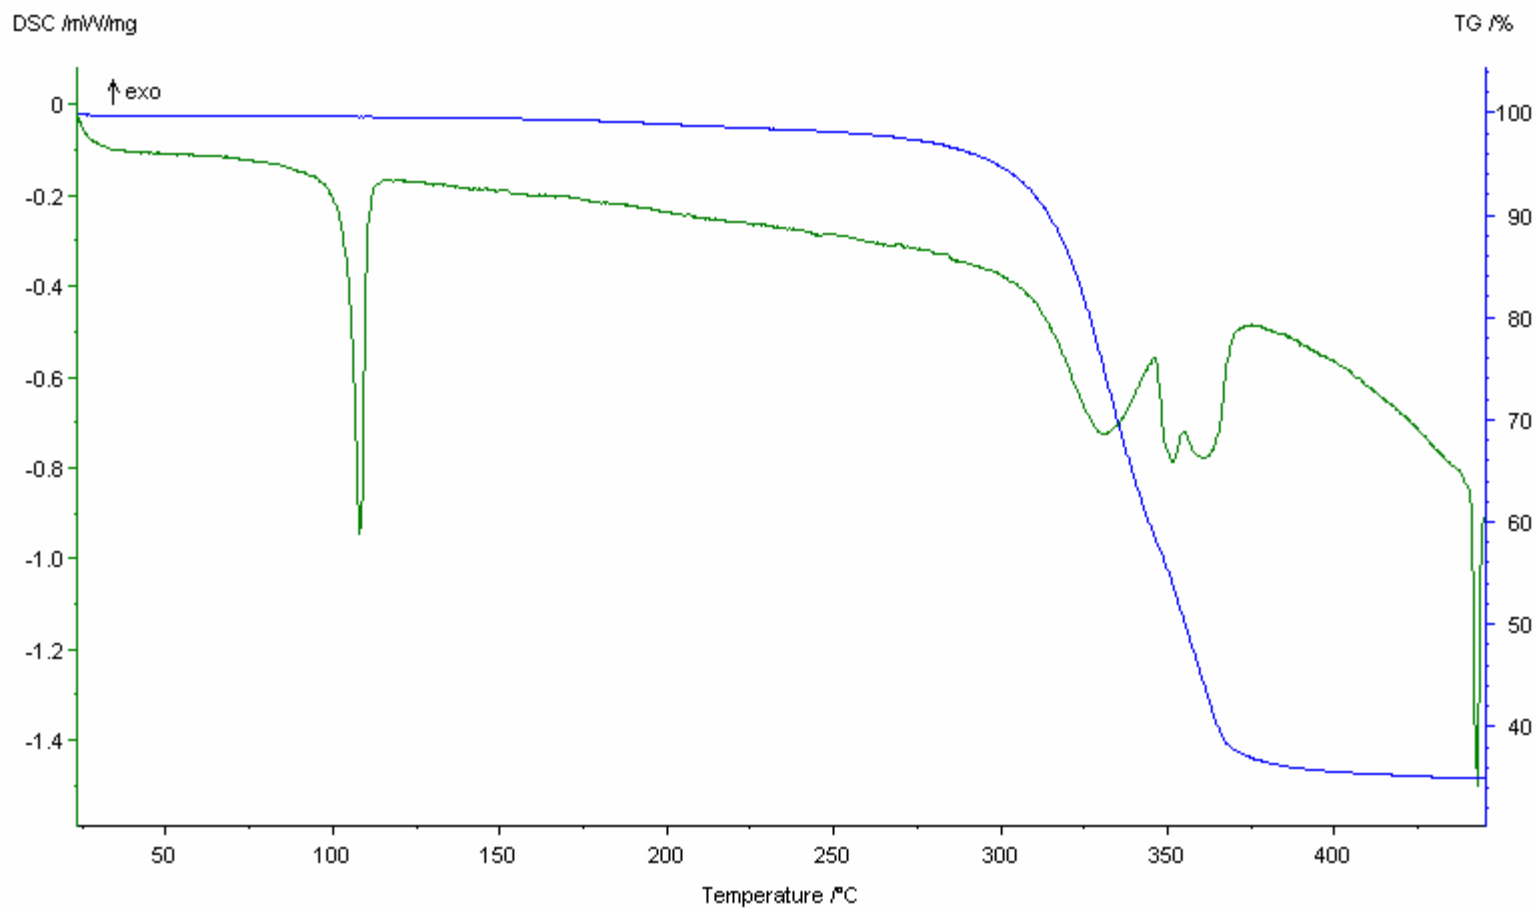

**Figure 3.** TGA/DSC Plot for  $\text{Cd}(\text{TePPr}^i_2\text{NPPr}^i_2)_2$  (7) [blue: TGA; green: DSC].

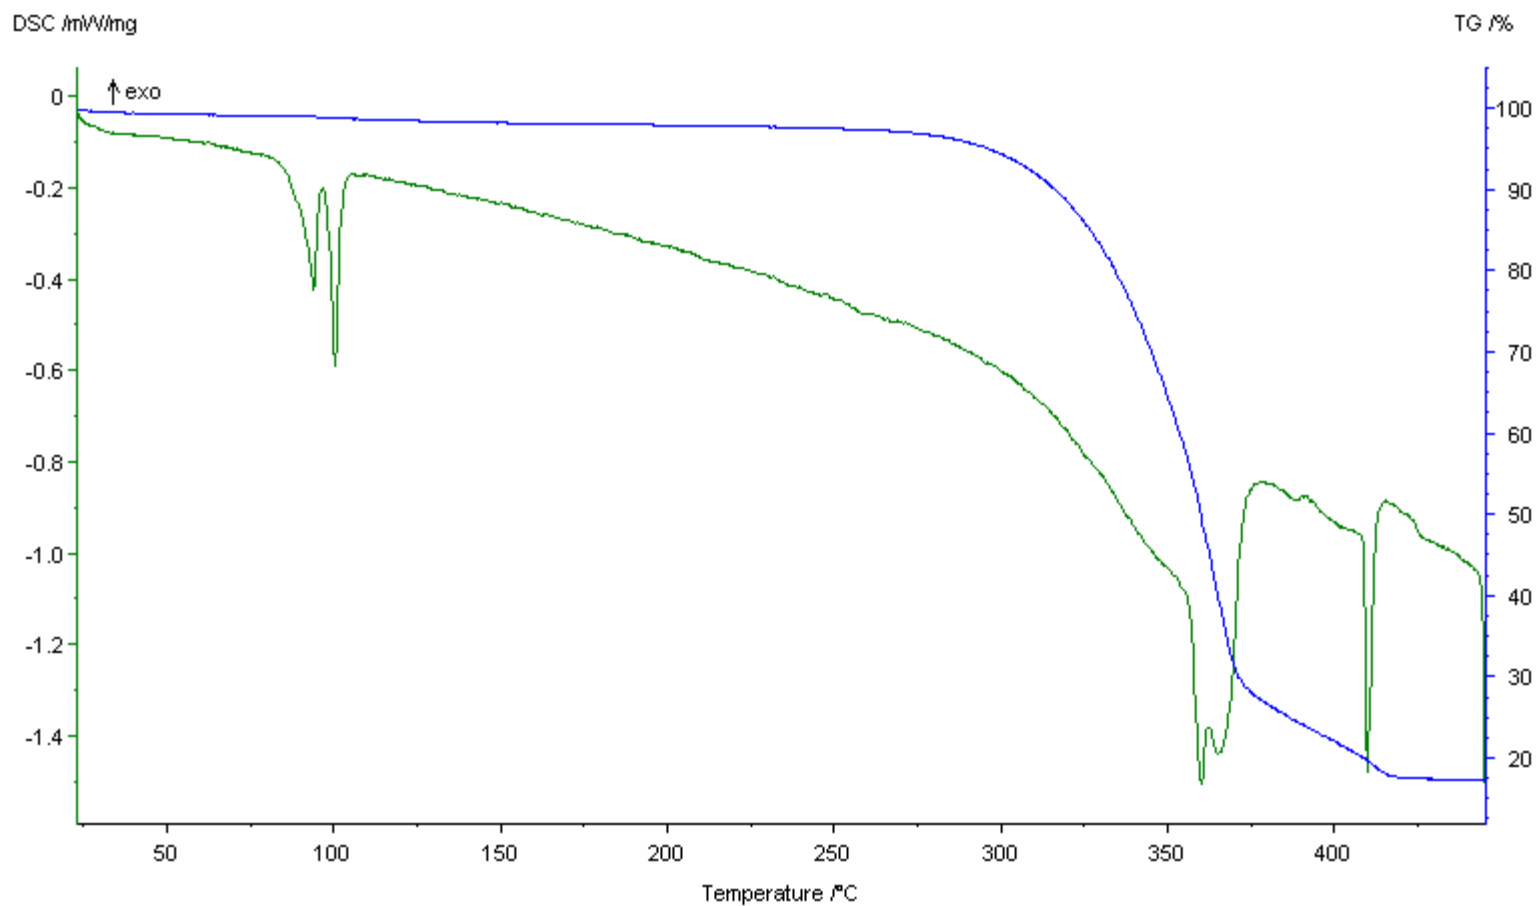

**Figure 4.** TGA/DSC Plot for  $\text{Hg}(\text{TePPr}^i_2\text{NPPr}^i_2)_2$  (**8**) [blue: TGA; green: DSC].
